# Supplementary material
Source: HighWire-hosted journal article supplement (https://jnm.snmjournals.org/highwire/filestream/94008/field_highwire_adjunct_files/0/060186_Supplemental_Figure_1.pdf)
Supplement: 060186_Supplemental_Figure_1.pdf [file 060186_Supplemental_Figure_1.pdf]

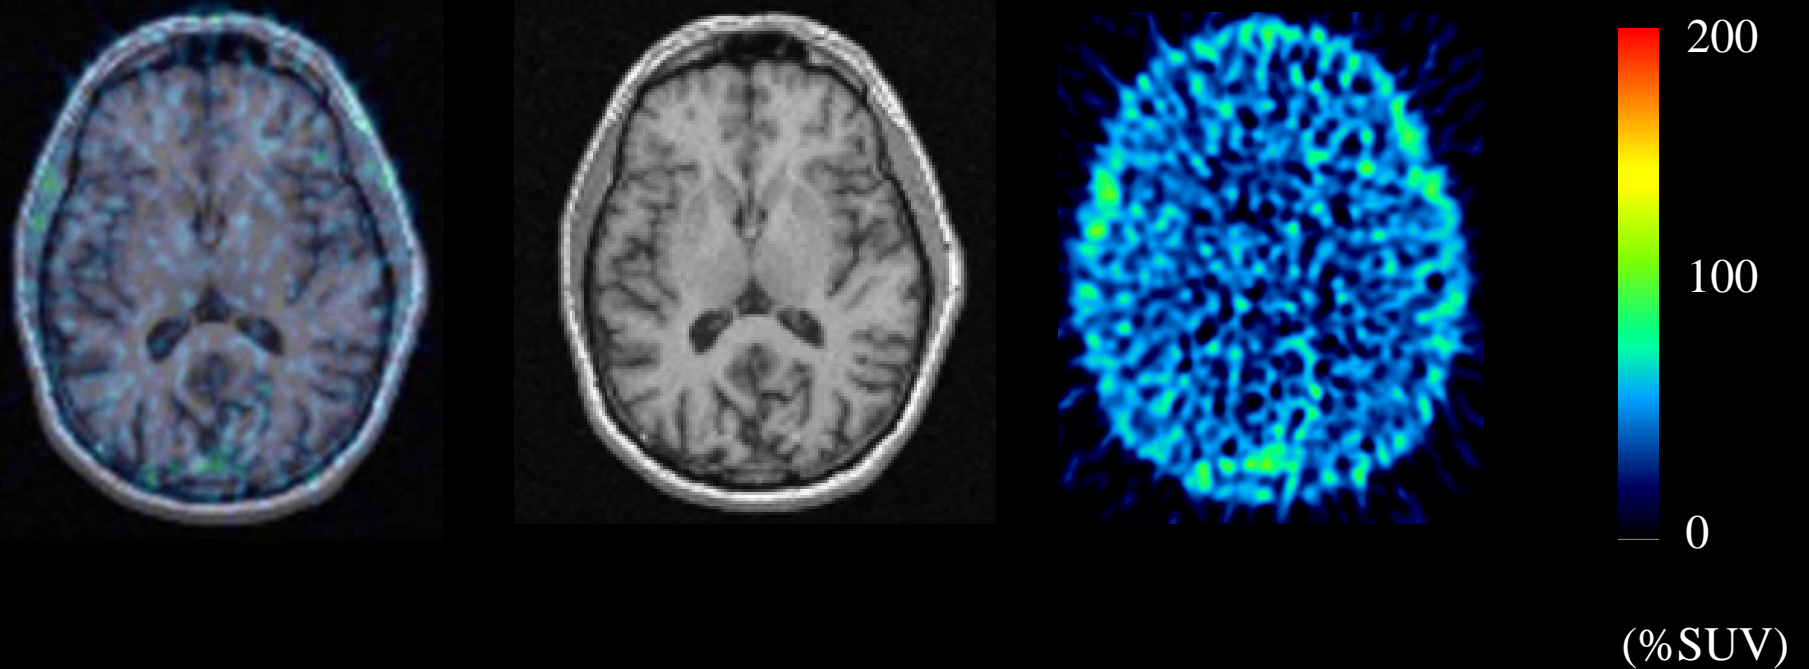

**Supplemental Fig. 1.** PET images from 180–300 minutes after injection of  $^{18}\text{F}$ -PBR06 were summed, and the pixel values represent the mean concentration of radioactivity (%SUV). The coregistered MRI images are in the middle column, and the fused PET and MRI images are in the left column.
